# Supplementary material
Source: publisher figshare collection journal article supplement (https://tandf.figshare.com/ndownloader/files/14357501)
Supplement: Supplementary file 1 [file 14357501]

**Appendix 1: Model output of research**

**
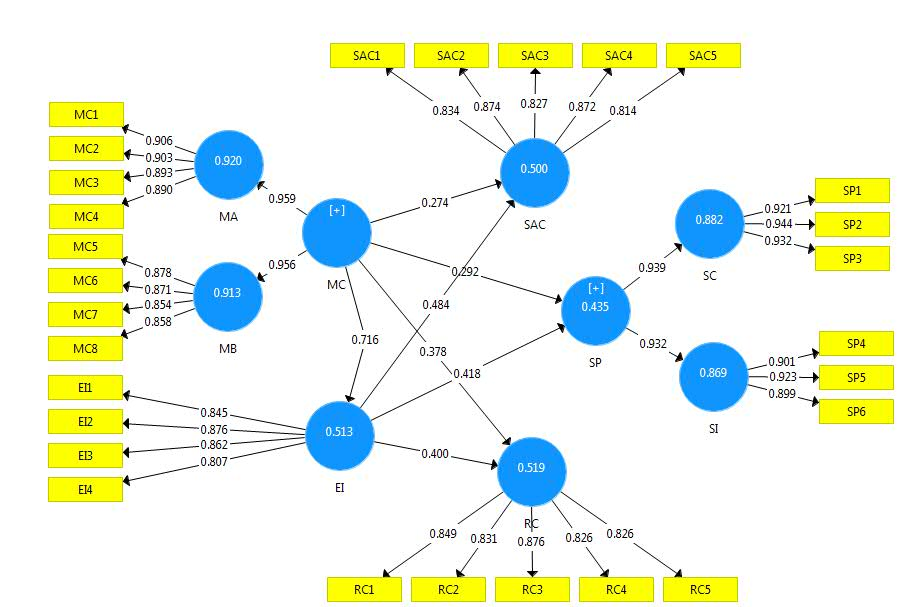
**

Note: EI = employees’ involvement; MA = managers’ attitude; MB = managers’ behaviour; MC = managers’ commitment; RC = reporting culture; SAC = safety awareness and competency; SI = safety involvement; SC = safety compliance; SP = safety performance.
